# Supplementary material for: Odor descriptive ratings can predict some odor-color associations in different color features of hue or lightness
Source: PeerJ. 2023 Apr 20;11:e15251. doi: 10.7717/peerj.15251 (PMC10122842; doi:10.7717/peerj.15251)
Supplement: Supplemental Information 2 [file peerj-11-15251-s002.docx]

## Supplementary method 2: Multilevel regression analysis including intercepts from individual errors.

We modeled the response value of the a*-axis for the associated colors by each odor as a normal distribution. The model included intercepts of individual errors as follows:

> 0

> 0

where *i* indicates the odor ID, *j* denotes the data index, and *k* denotes participant ID. In this model, the intercept term was + . The intercept , and each coefficient, , followed a normal distribution with mean coefficients as described in Manuscript.

The intercept followed a normal distribution as below:

where indicates the standard deviation of among all participants.

Regarding the model for a* value estimation, we modeled the b*-axis values as follows:

The intercept followed a normal distribution as below:

where indicates the standard deviation of among all participants.

Similar to the steps with a* and b* values, we model the L-axis values as follows:

The intercept followed a normal distribution as below:

where indicates the standard deviation of among all participants.
